# Supplementary material
Source: PubMed Central journal article supplement (PMC6696927)
Supplement: NIHMS983968-supplement-supplement.pdf [file NIHMS983968-supplement-supplement.pdf]

# European Journal of Immunology

Supporting Information

for

DOI 10.1002/eji.201847583

Guobao Chen, William Bracamonte-Baran, Nicola L. Diny, Xuezhou Hou, Monica V. Talor, Kai Fu, Yue Liu, Giovanni Davogusto, Hernan Vasquez, Heinrich Taegtmeyer, O. Howard Frazier, Ari Waisman, Simon J. Conway, Fengyi Wan and Daniela Čiháková

**Sca-1<sup>+</sup> cardiac fibroblasts promote development  
of heart failure**

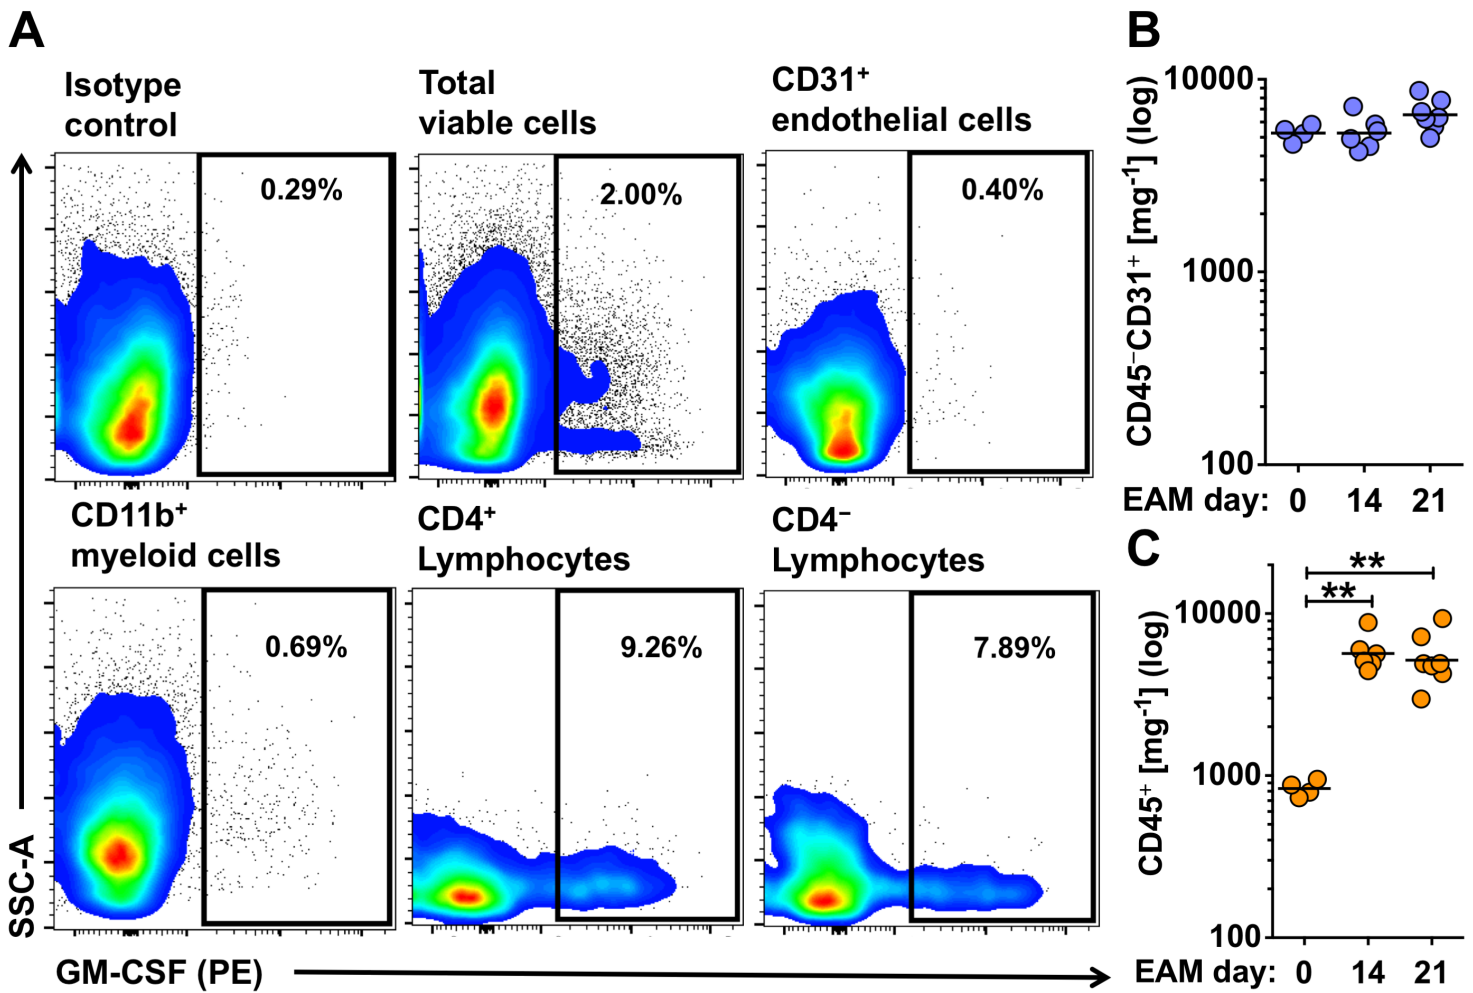

**Supplementary Figure 1. GM-CSF production by other cardiac cells**

(A) Representative flow cytometry plots showing GM-CSF staining of all cardiac cells, CD31<sup>+</sup> endothelial cells, CD11b<sup>+</sup> myeloid cells, CD4<sup>+</sup> lymphocytes and CD4<sup>-</sup> lymphocytes from mouse hearts on day 21 of EAM. (B-C) Flow cytometric quantification of numbers of (B) CD45<sup>-</sup>CD31<sup>+</sup> endothelial cells and (C) CD45<sup>+</sup> leukocytes per mg cardiac tissue at different time points after EAM induction (n = 4 for EAM day 0 group; n = 6 for EAM day 14 group; n = 7 for EAM day 21 group). Data are representative of three independent experiments. Groups were compared using one-way ANOVA followed by Tukey's post-test. \*\*, P < 0.01.

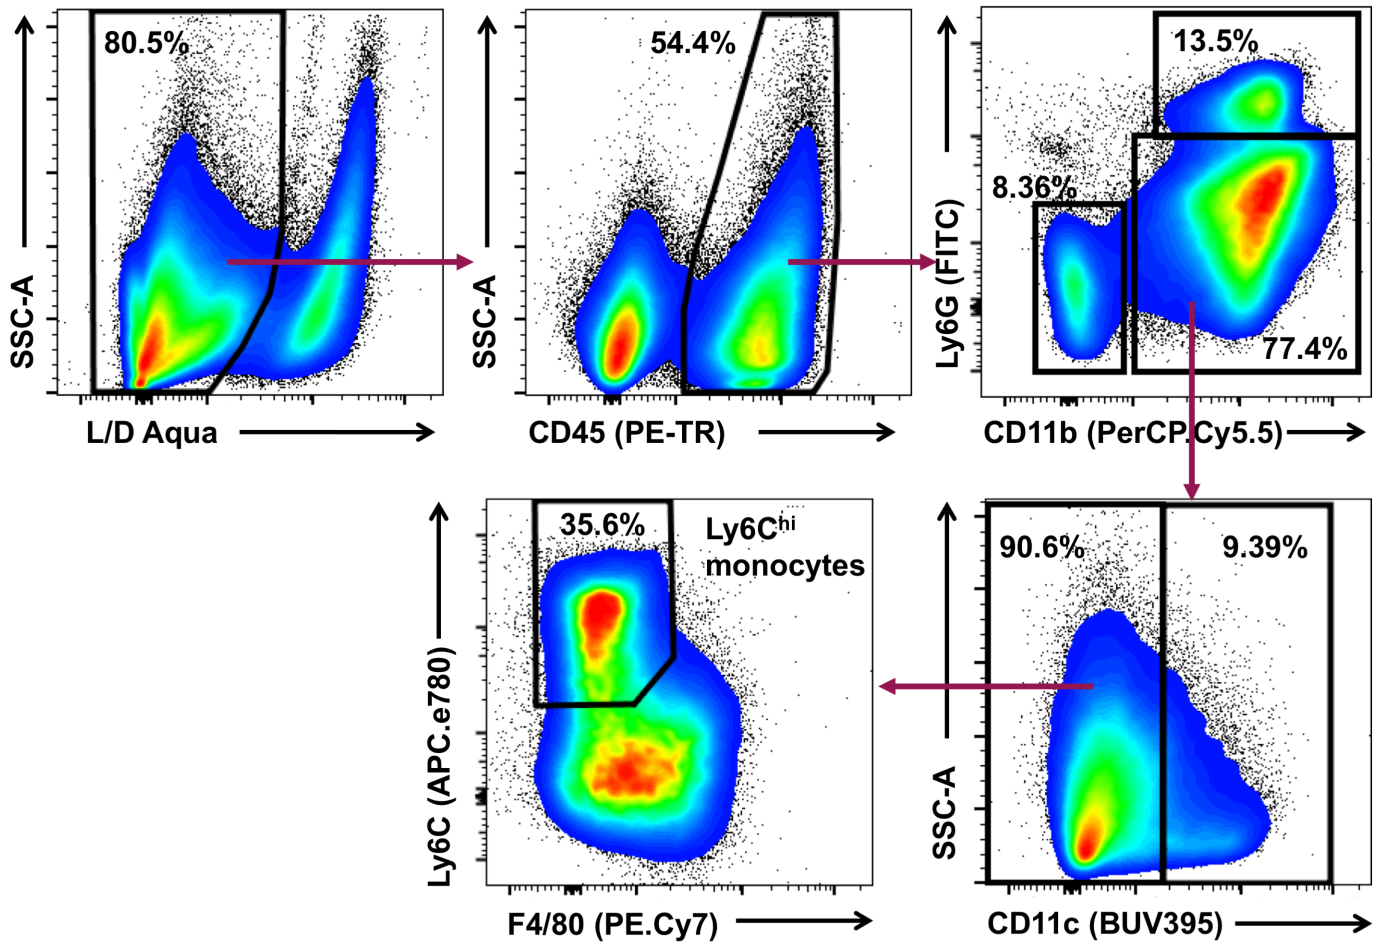

**Supplementary Figure 2. Gating strategies for inflammatory Ly6C<sup>hi</sup> monocytes.**

Representative flow cytometry plots showing the gating strategies for Ly6C<sup>hi</sup> monocytes. Ly6C<sup>hi</sup> monocytes were gated as viable CD45<sup>+</sup>Ly6G<sup>-</sup>CD11b<sup>+</sup>CD11c<sup>-</sup>F4/80<sup>-</sup>Ly6C<sup>hi</sup> cardiac cells.

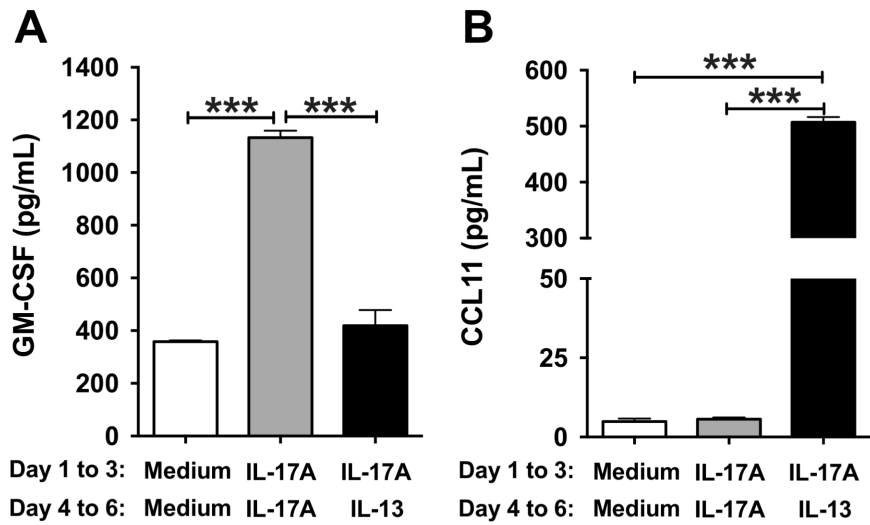

**Supplementary Figure 3. Cultured human primary cardiac fibroblasts exhibit functional plasticity.**

Secreted GM-CSF (A) and CCL11 (B) protein levels in the supernatants of cultured human primary cardiac fibroblasts under IL-17A, IL-13 or unstimulated (control) for three days and washed and new medium was added with/without change of stimuli for another three days. Supernatants were harvested on day 6, GM-CSF and CCL11 concentrations were measured by ELISA. Data are shown as mean  $\pm$  SD of technical triplicates and are representative of three independent experiments. Groups were compared using one-way ANOVA followed by Tukey's post-test. \*\*\*,  $P < 0.001$ .

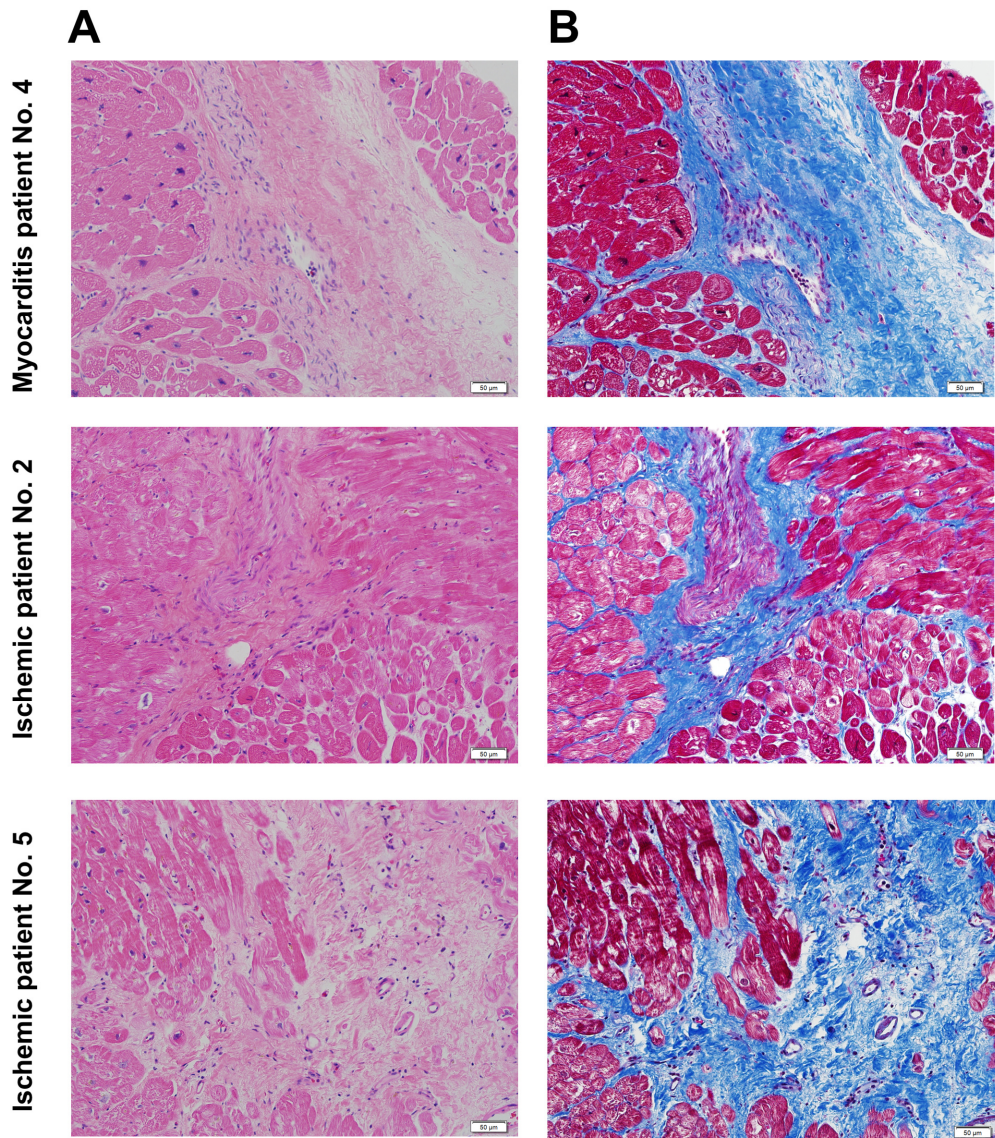

**Supplementary Figure 4. Both fibrosis and infiltration are present in chronic heart failure patient biopsy samples.**

Representative histology slides with H&E staining (Scalebar, 50  $\mu$ m) (**A**) or Masson's trichrome staining (Scalebar, 50  $\mu$ m) (**B**) of consecutive cuts of the cardiac biopsy samples from myocarditis patient No. 4, Ischemic patient No. 2 and No. 5.

**Supplementary Table 1. List of antibodies**

|       | Antigen        | Clone#/Cat#    | Company             | Usage          |
|-------|----------------|----------------|---------------------|----------------|
| Human | CCL2           | 24822          | R&D Systems         | Flow cytometry |
|       | CD105          | 266            | BD Biosciences      | Flow cytometry |
|       | CD29           | TS2/16         | BioLegend           | Flow cytometry |
|       | CD31           | WM59           | BioLegend           | Flow cytometry |
|       | CD45           | HI30           | BD Biosciences      | Flow cytometry |
|       | CD73           | AD2            | BioLegend           | Flow cytometry |
|       | CD90           | 5E10           | BioLegend           | Flow cytometry |
|       | cKit           | 104D2          | BioLegend           | Flow cytometry |
|       | DDR2           | 290804         | R&D Systems         | Flow cytometry |
|       | GM-CSF         | BVD2-21C11     | BioLegend           | Flow cytometry |
|       | PDGFR $\alpha$ | 16A1           | BioLegend           | Flow cytometry |
| Mouse | CCL2           | 2H5            | BioLegend           | Flow cytometry |
|       | CD11b          | M1/70          | BioLegend           | Flow cytometry |
|       | CD11c          | HL3            | BD Biosciences      | Flow cytometry |
|       | CD29           | HMb1-1         | eBioscience         | Flow cytometry |
|       | CD31           | 390            | BioLegend           | Flow cytometry |
|       | CD34           | HM34           | BioLegend           | Flow cytometry |
|       | CD4            | GK1.5          | BioLegend           | Flow cytometry |
|       | CD45           | 30-F11         | Invitrogen          | Flow cytometry |
|       | CD90.2         | 30-H12         | BioLegend           | Flow cytometry |
|       | Collagen I     | 600-402-103    | Rockland antibodies | Flow cytometry |
|       | F4/80          | BM8            | eBioscience         | Flow cytometry |
|       | Feeder         | mEF-SK4        | Miltenyi Biotec     | Flow cytometry |
|       | GM-CSF         | MP1-22E9       | BioLegend           | Flow cytometry |
|       | Ly6C           | HK1.4          | eBioscience         | Flow cytometry |
|       | Ly6G           | 1A8            | BioLegend           | Flow cytometry |
|       | NFAT2          | 7A6            | BioLegend           | Flow cytometry |
|       | p-p65          | 93H1           | Cell Signaling      | Flow cytometry |
|       | PDGFR $\alpha$ | APA5           | eBioscience         | Flow cytometry |
|       | Sca-1          | D7             | BioLegend           | Flow cytometry |
|       | Actin          | A5316          | Sigma               | Immunoblot     |
|       | Erk1/2         | 4695T          | Cell Signaling      | Immunoblot     |
|       | NFAT2          | 8032S          | Cell Signaling      | Immunoblot     |
|       | p-Erk1/2       | 4370T          | Cell Signaling      | Immunoblot     |
|       | p-p65          | 3037           | Cell Signaling      | Immunoblot     |
|       | p-Stat3        | 9145T          | Cell Signaling      | Immunoblot     |
|       | p-Stat6        | 9361T          | Cell Signaling      | Immunoblot     |
|       | p65            | sc-372         | Santa Cruz          | Immunoblot     |
|       | Parp1          | sc-7150        | Santa Cruz          | Immunoblot     |
|       | pro-Casp3      | 9622           | Cell Signaling      | Immunoblot     |
|       | Stat3          | 9139T          | Cell Signaling      | Immunoblot     |
| Stat6 | 9362S          | Cell Signaling | Immunoblot          |                |

**Supplementary Table 2. List of mouse primers**

| Gene          | Forward primer          | Reverse primer           |
|---------------|-------------------------|--------------------------|
| <i>Ccl2</i>   | GTCGGAGAGCTACAAGAGGATCA | AGCTTGGTGACAAAACTACAGCTT |
| <i>Ccl11</i>  | GAATCACCAACAACAGATGCAC  | TCCTGGACCCACTTCTTCTT     |
| <i>Cxcl10</i> | CCAAGTGCTGCCGTCATTTTC   | TCCCTATGGCCCTCATTCTCA    |
| <i>Csf2</i>   | CCGTAGACCCTGCTCGAATA    | TGCCTGTCACATTGAATGAA     |
| <i>Gapdh</i>  | TCCTCCTCAGACCGCTTTT     | TCTGCTGGAGTCCCCTTG       |
| <i>Postn</i>  | CCTGCCCTTATATGCTCTGCT   | AAACATGGTCAATAGGCATCACT  |
